1 **Fusion of DARPin to aldolase enables visualization of small**  
2 **protein by cryoEM**

3  
4 Running title: Visualization of small protein by cryoEM

5  
6  
7 Qing Yao<sup>1¶</sup>, Sara J. Weaver<sup>2¶</sup>, Jee-Young Mock<sup>2</sup> and Grant J. Jensen<sup>1,3\*</sup>

8  
9 <sup>1</sup>Division of Biology and Biological Engineering, California Institute of Technology, 1200 E.  
10 California Blvd., Pasadena, CA 91125

11  
12 <sup>2</sup>Division of Chemistry and Chemical Engineering, California Institute of Technology, 1200 E.  
13 California Blvd., Pasadena, CA 91125

14  
15 <sup>3</sup>Howard Hughes Medical Institute, 1200 E. California Blvd., Pasadena, CA 91125

16  
17 \*Corresponding author

18 Email: [jensen@caltech.edu](mailto:jensen@caltech.edu) (GJJ)

19  
20 <sup>¶</sup>These authors contributed equally to this work.

21  
22  
23  
24

## Abstract

25  
26  
27  
28  
29  
30  
31  
32  
33  
34  
35  
36  
37  
38  
39  
40  
41  
42  
43  
44  
45  
46  
47  
48  
49  
50  
51

In recent years, solving protein structures by single particle cryogenic electron microscopy (cryoEM) has become a crucial tool in structural biology. While exciting progress is being made towards the visualization of smaller and smaller macromolecules, the median protein size in both eukaryotes and bacteria is still beyond the reach of single particle cryoEM. To overcome this problem, we implemented a platform strategy in which a small protein target was rigidly attached to a large, symmetric base via a selectable adapter. Seven designs were tested. In the best construct, a designed ankyrin repeat protein (DARPin) was rigidly fused to tetrameric rabbit muscle aldolase through a helical linker. The DARPin retained its ability to bind its target, the 27 kDa green fluorescent protein (GFP). We solved the structure of this complex to 3.0 Å resolution overall, with 5 to 8 Å resolution in the GFP region. As flexibility in the DARPin limited the overall resolution of the target, we describe strategies to rigidify this element.

52  
53  
54  
55  
56  
57  
58  
59  
60  
61  
62  
63  
64  
65  
66  
67  
68  
69  
70  
71  
72  
73  
74  
75  
76  
77  
78  
79  
80  
81  
82

## Author summary

Single particle cryogenic electron microscopy (cryoEM) is a technique that uses images of purified proteins to determine their atomic structure. Unfortunately, the majority of proteins in the human and bacterial proteomes are too small to be analyzed by cryoEM. Over the years, several groups have suggested the use of a platform to increase the size of small protein targets. The platform is composed of a large protein base and a selectable adapter that binds the target protein. Here we report a platform based on tetrameric rabbit muscle aldolase that is fused to a Designed Ankyrin Repeat Protein (DARPin). Phage display libraries can be used to generate DARPins against target proteins. The residues mutated in a phage display library to generate a DARPin against a new target do not overlap with the DARPin-base fusion in the platform, thus changing the DARPin identity will not disrupt the platform design. The DARPin adapter used here is capable of binding Green Fluorescent Protein (GFP). We report the structure of GFP to 5 to 8 Å local resolution by single particle cryoEM. Our analysis demonstrates that flexibility in the DARPin-aldolase platform prevents us from achieving higher resolution in the GFP region. We suggest changes to the DARPin design to rigidify the DARPin-aldolase platform. This work expands on current platforms and paves a generally applicable way toward structure determination of small proteins by cryoEM.

83  
84  
85  
86  
87  
88  
89  
90  
91  
92  
93  
94  
95  
96  
97  
98  
99  
100  
101  
102  
103  
104  
105  
106  
107  
108  
109  
110  
111  
112  
113

## Introduction

Single particle cryoEM can reveal the structures of large macromolecular complexes to near atomic resolution. To solve a protein structure by single particle cryoEM, purified proteins are rapidly frozen in a thin layer of vitreous ice. A transmission electron microscope is used to collect projection images of the protein. Individual proteins are identified in the ice and their orientations are computationally determined. The projection images are then combined to calculate a 3D reconstruction of the protein.

A fundamental challenge in single particle cryoEM is that small proteins do not produce enough contrast in noisy projection images to precisely determine their orientation. Richard Henderson estimated that with ideal images, a 3 Å structure could be reconstructed for a 40 kDa protein (1). Unfortunately, real electron micrographs are imperfect so this theoretical minimum of macromolecular size has never been reached. The smallest protein to be solved to near atomic resolution so far by cryoEM is hemoglobin (64 kDa) (2), but the median protein lengths in both bacteria (27 kDa) and eukaryotes (36 kDa) are about two times smaller (3). Consequently, many proteins in biology are beyond the reach of high-resolution structure determination by single particle cryoEM.

Over the years, several strategies to overcome the size limit problem in single particle cryoEM have been suggested. Two major themes have emerged to increase the target mass and improve its orientation determination. First, the target can be decorated with antibody fragments (6) (7). Second, the target can be rigidly attached to a large platform protein. The platform is typically composed of a base protein and an adapter. The purpose of the base protein is to increase the molecular weight, which facilitates accurate particle picking and precise particle orientation determination. The adapter can be customized (a covalent fusion between the target and the base) or general (a selectable adapter that facilitates non-covalent binding of the target to the platform base). Covalent approaches have utilized direct fusions between the target protein and the base either via a flexible linker adapter (4) or a helical junction adapter (5) (8). For the platform to be successful, the adapter must be rigidly attached to the base. The flexible linker adapter was therefore insufficient to determine the structure of the target (4), but the use of a helix-forming

114 peptide linker (8)(9) or direct concatenation of two helices (5)(10) has shown promise. Most  
115 recently, Liu et al. demonstrated that a rigid, continuous  $\alpha$ -helix could be formed by linking the  
116 terminal  $\alpha$ -helices of a designed ankyrin repeat protein (DARPin) and a nanocage subunit  
117 through a helix-forming peptide linker (9) (8). Notably, Liu et al were able to show the structure  
118 of the 17 kDa DARPin to 3.5 to 5 Å local resolution (8). Unfortunately, these strategies are  
119 limited to target proteins with a terminal  $\alpha$ -helix, and their implementation requires that the  
120 length of the helical junction adapter must be customized for each new target. Utilizing a non-  
121 covalent platform strategy with a selectable adapter (like an antibody or a DARPin) has the  
122 potential to be generally applicable, regardless of the structure of the target, since the selectable  
123 adapter could be raised against any target using phage display, while the invariant nature of the  
124 adapter framework region would allow the one-time optimization of a rigid attachment point  
125 between it and the base. Along these lines, Liu et al. suggested that their DARPin-nanocage  
126 could display a small protein for structure determination by cryoEM (8), but so far no group has  
127 demonstrated this.

128  
129 Here we report the outcomes of a variety of new designs and report the structure of the first small  
130 protein visualized through a base/selectable-adapter platform approach.

131

## 132 **Results**

133

### 134 *Platform strategy and design*

135 The goal of our study was to design a generally applicable platform to solve small protein  
136 structures by single particle cryoEM. We explored several candidate base proteins and selectable  
137 adapters (Fig S1). We favored bases that were easy to purify and that had already been solved to  
138 high-resolution by single particle cryoEM. We reasoned that oligomeric and symmetric (as a  
139 globular protein, or as a helical tube) bases would be best.

140

141 As selectable adapters, we first considered antibody fragments (Fabs and scFvs). Fabs have a  
142 flexible elbow connecting two immunoglobulin regions, whereas scFvs are made up of one  
143 immunoglobulin region. The Fab elbow could introduce flexibility, so we preferred the smaller,  
144 more compact scFv. However, because the beta sandwich immunoglobulin fold of a scFv could

145 be difficult to rigidly fuse to the surface of a platform base, we identified Staphylococcus Protein  
146 A (PrA) as a linker that could bind the invariant region of a scFv (11). As PrA is a three-helix  
147 bundle, we reasoned that it could be rigidly attached to a base via a helical linker. Thus in one of  
148 our designs, the C-terminal helix of PrA was fused to the N-terminal helix of the base protein.  
149 Since PrA is capable of binding the invariant scFv framework, the base-PrA:scFv interfaces  
150 would not need to be redesigned for each new target. Unfortunately, in our biochemical  
151 experiments, we observed that the PrA:scFv interaction did not remain stable through a gel  
152 filtration column, indicating that the binding affinity was not strong enough for our purposes.  
153 Further mutagenesis to the PrA:scFv interface may strengthen the interaction. Regardless, a  
154 fundamental concern with this design is that two non-covalent binding interactions are required  
155 (PrA:scFv, and scFv:target), which could lead to occupancy issues. As a result, we moved to  
156 DARPin as our selectable adapter (Fig 1B).

157  
158 In our designs, the final alpha helix of the DARPin C-terminal cap (C-cap) was directly fused to  
159 the first  $\alpha$ -helix of the base (Fig 1C). All DARPin libraries use a C-cap to stabilize the protein, so  
160 we expect it will be straightforward to swap in any DARPin built on the same framework (Fig  
161 1B). In the base-DARPin platform design, only one non-covalent interaction is required  
162 (between the DARPin and the target), which results in a more predictable and stable complex.  
163 We chose a DARPin that formed a stable complex with GFP as a first test case (12) and screened  
164 several base-DARPin candidates.

165  
166 *Screening base candidates*

167 We performed expression trials for five of our base-DARPin candidates (Fig S1). These bases  
168 included  $\beta$ -galactosidase ( $\beta$ -gal) (13), the vipA/vipB helical tube (14), the *E. coli* ribosome (15),  
169 TibC (16), and aldolase (17).

170  
171 Because  $\beta$ -gal tetramerization requires the N- and C-termini of each subunit (18), an internal  
172 DARPin insertion was used, flanked by a helix-forming peptide (at the DARPin N-cap) and a  
173 flexible linker (at the DARPin C-cap) (9). Biochemically the  $\beta$ -gal-DARPin platform formed a  
174 stable complex with GFP, but no cryoEM density was observed for the DARPin or GFP in our 3  
175 Å reconstruction. This means that the helical linker was flexible relative to the  $\beta$ -gal base.

176

177 We therefore focused on bases with a terminal  $\alpha$ -helix that could be rigidly fused to the DARPin.  
178 The vipA/vipB, ribosome L29, TibC, and aldolase proteins all had long terminal  $\alpha$ -helices to  
179 facilitate direct fusion. In our experiments, the helical tube vipA-DARPin/vipB platform  
180 exhibited poor expression in *E. coli*, while the L29-PrA fusion did not integrate well into  $\Delta$ L29  
181 *E. coli* ribosomes (15) (Fig S1). The purified TibC-DARPin platform formed a stable complex  
182 with GFP, but the complex demonstrated aggregation and preferred orientation on plunge frozen  
183 grids. In contrast, the DARPin-aldolase platform was well-behaved.

184

185 In our DARPin-aldolase platform, the C-terminal  $\alpha$ -helix of the DARPin was directly  
186 concatenated to the N-terminal  $\alpha$ -helix of aldolase (Fig 1C) (S2 Fig A). The D2 symmetry of the  
187 DARPin-aldolase platform provided extensive space for the target and could potentially  
188 accommodate a globular protein of up to 740 kDa without steric clash (Fig 1E, 1F) (S1 Movie).  
189 The purified GFP:DARPin-aldolase complex was stable in a gel filtration column with an  
190 apparent 1:1 stoichiometry of DARPin-aldolase to the target (GFP) (S2 Fig B and C).

191

#### 192 *CryoEM analysis of the GFP:DARPin-aldolase complex*

193 To solve the structure of GFP bound to the DARPin-aldolase platform, we collected 1,681  
194 micrographs on a Titan Krios (Fig S3). Because the thin ice forced a slight preferred orientation  
195 issue, an additional 1,180 micrographs were collected at 26° tilt (see methods) (19). High quality  
196 micrographs were selected after CTF correction (Fig S4) and particles were autopicked in Relion  
197 (Fig S3). After 2D classification in cryoSPARC, classes with strong secondary structure were  
198 selected for reconstruction. The GFP:DARPin-aldolase complex reconstruction yielded an  
199 overall resolution of 3 Å with C1 symmetry (Fig S5B). Further classification suggested too much  
200 conformational heterogeneity to apply D2 symmetry. The aldolase core and the helical linker  
201 were resolved to near atomic resolution (Fig 2B, 2C, 2D). The DARPin and GFP exhibited a  
202 local resolution of 4 to 8 Å, with discontinuous regions of higher resolution of 3.5 Å (Fig 2D)  
203 (S2 Movie). Although the resolution in the GFP and DARPin portion was not sufficient to build  
204 a model or assign sequence *de novo*, the static X-ray structures of GFP and the DARPin could be  
205 reliably docked into the map (Fig 2A).

206

207 *DARPin framework caused conformational heterogeneity*

208 Because of the 5 to 8 Å local resolution range in the GFP portion of the map (Fig 2D), we  
209 suspected that part of the GFP:DARPin-aldolase complex was flexible. To better understand the  
210 conformational heterogeneity in the data, a mask was generated around a single DARPin/GFP  
211 unit and Relion particle symmetry expansion was used to consider each subunit individually (Fig  
212 3A, Fig S3) (21). The symmetry expanded particles were subjected to 3D classification without  
213 alignment, a strategy in which the orientation parameters determined in the previous refinement  
214 are used to classify the particles into subsets. For this focused classification, a spherical mask  
215 that encompassed the aldolase surface was used to increase the signal. The resulting five classes  
216 showed reasonable GFP:DARPin conformations (Fig 3B), but subsequent refinements were still  
217 limited to 5 to 6 Å overall, which suggested that additional conformational heterogeneity  
218 remained within the subsets. The majority of the particles (54%) were classified into class 2  
219 (yellow), which appeared to lack a DARPin (Fig 3B). Class 2 was subjected to an additional  
220 round of 3D classification where it revealed several reasonable but lower resolution  
221 GFP:DARPin conformations (Fig S6). To investigate the heterogeneity in the focused classes,  
222 we compared each class to class 4 (Fig 3C, 3D). In the different classes, the GFP:DARPin  
223 density shows a clear rocking around the Y axis (Fig 3C) and around the Z axis (Fig 3D) relative  
224 to the aldolase base. At this point, we wondered if any these displacements could be attributed to  
225 the aldolase subunit. We performed a similar focused classification experiment with a mask  
226 around the aldolase subunit and the helical linker, but no rotation or shift was observed in the  
227 resulting subsets (data not shown). Thus, we concluded that the displacement likely arose in the  
228 C-cap second helix that is fused into the helical linker, and other regions of the DARPin distal to  
229 the linker.

230

231

## Discussion

232

233 In this study, we designed and tested a variety of platforms capable of non-covalently binding a  
234 small target protein via a selectable adapter for structure determination by single particle  
235 cryoEM. In our best construct, we resolved our target protein (GFP) to 5 to 8 Å resolution.

236



237 Our DARPin-aldolase platform has several advantages over other strategies. It is simple to  
238 express and purify. Aldolase has D2 symmetry and allows attachment of four targets without  
239 steric clash. Aldolase can be reconstructed to 2.6 Å resolution with even a 200 keV microscope  
240 (17). Because DARPins can be readily generated against a wide range of small protein targets,  
241 the attachment of a DARPin to aldolase promises to be a generally applicable strategy. A recent  
242 study of the insulin degrading enzyme (IDE) bound to Fabs was able to isolate several IDE  
243 conformations using different Fabs (22). It stands to reason that different DARPins could also  
244 stabilize different conformations of the target. Because switching DARPins in the platform  
245 would be done by straight-forward DNA manipulations, our DARPin-aldolase platform has the  
246 potential to resolve a series of conformations of the target protein.

247  
248 Our biochemistry experiments suggested that the purified GFP:DARPin-aldolase complex was  
249 very stable, and clear secondary structure was apparent in the 2D classes, yet heterogeneity  
250 remained. Because the aldolase base and the helical linker region were resolved to near atomic  
251 resolution (Fig 2B and 2C), the heterogeneity likely began in the DARPin C-cap. The DARPin  
252 against GFP used here was from a first generation DARPin library. The C-cap of the first  
253 generation DARPins was reported to be less stable than the other repeat modules (23). While the  
254 crystal structure contained a well-resolved C-cap, the heterogeneity observed here suggests that  
255 it is not yet sufficiently rigid to serve as an attachment point in a cryoEM platform (Fig 3).  
256 Recent DARPin phage display libraries contain DARPins with reduced surface entropy and a  
257 more stable C-cap sequence (23), however, and additional stabilizing surface interactions could  
258 be introduced in future designs (28) (29), or even a second attachment point of the DARPin to  
259 the base (at both N- and C-terminal caps of DARPin for instance). Together such improvements  
260 could allow the DARPin-aldolase platform to reveal the structures of many small proteins to near  
261 atomic resolution.

262

## 263 **Materials and Methods**

264

### 265 *Computational design*

266 Computational  $\alpha$ -helix fusion was generated by manually docking the rabbit muscle aldolase  
267 structure (PDB code: 5VY5) and GFP/DARPin complex (PDB code: 5MA6). In order to rigidly

268 join the aldolase and DARPin moiety together, we truncated the C-terminal flexible loop on  
269 DARPin and N-terminal flexible loop on aldolase, respectively, exposing the two terminal  $\alpha$ -  
270 helices. The two terminal  $\alpha$ -helices were manually concatenated and joined together to form an  
271 ideal  $\alpha$ -helix using building  $\alpha$ -helix tool in UCSF Chimera (30). The model was inspected for the  
272 orientation of DARPin relative to the aldolase, ensuring no steric clash and the providing enough  
273 space for target protein attachment. All structural design figures were generated using  
274 PyMOL1.8 (<https://pymol.org>).

275  
276 *Cloning, protein expression, and purification of the recombinant DARPin-aldolase platform and*  
277 *GFP*

278 The DARPin sequence was DARPin 3G86.32 (Fig S2A) (12). The cDNA expressing GFP and  
279 our DARPin-aldolase fusion were synthesized at IDT DNA company. The cDNA of GFP and  
280 DARPin-aldolase fusion were PCR-amplified and inserted into pACYCDuet and pET21b vector  
281 for recombinant expression in *E. coli*, producing no-tag GFP protein and C-terminal His-tag of  
282 DARPin-aldolase chimeric fusion. GFP and DARPin-aldolase were coexpressed in *E. coli*  
283 BL21(DE3) (Lucigen) using autoinduction medium with trace elements (Formedium) at 30 °C  
284 for overnight. Cells were harvested by centrifugation and the protein complex was then purified  
285 with Ni-NTA affinity chromatography (Qiagen), and Superdex 200 chromatography (GE  
286 healthcare). The purified GFP-DARPin-aldolase complex was concentrated to 2.5mg/ml in a  
287 buffer containing 25 mM Tris-HCl pH 8.0 and 150 mM NaCl.

288  
289 *CryoEM sample preparation and data collection*

290 Electron microscopy grids were prepared at Scripps Research Institute. Briefly, 3  $\mu$ L sample of  
291 2.5 mg/ml GFP-DARPin-aldolase complex was applied to a plasma cleaned Au UltraFoil Grid  
292 (300 Mesh, R2/2, Quantifoil) in a cold room (4°C,  $\geq$ 95% relative humidity). The grid was  
293 manually blotted with a filter paper (Whatman No.1) for approximately 3 seconds before  
294 plunging into liquid ethane using a manual plunger (17). The grids were screened in Talos  
295 Arctica 200 kV with Falcon 3 (FEI) direct electron detector for ice thickness and sample  
296 distribution. Micrographs of GFP-DARPin-aldolase complex were collected on Titan Krios  
297 microscope (FEI) operating and 300 kV with energy filter (Gatan) and equipped with a K2  
298 Summit direct electron detector (Gatan). For untilted data, Serial EM was used for automated

299 EM image acquisition (31). After calculating an efficiency score from early refinements using  
300 cryoEF (19), additional data were collected at 26° using EPU software (FEI). A nominal  
301 magnification of 165,000x was used for data collection, corresponding to a pixel size of 0.865 Å  
302 at the specimen level, with the defocus ranging from -1.0 μm to -3.0 μm. Movies were recorded  
303 in superresolution mode, with a total dose of ~40 e-/ Å<sup>2</sup>, fractioned into 20 frames (0° tilt  
304 images) or 40 frames (26° tilt images) under the does rate of 8.4 electron per pixel per second.

305

### 306 *Image processing and structure analysis*

307 Movies were decompressed and gain corrected with IMOD (32). Motion correction was  
308 performed using program MotionCor2 (33), and exposure filtered in accordance with relevant  
309 radiation damage curves (34). Micrographs with high CTF Figure of Merit scores and a  
310 maximum resolution great than 3.6 Å were selected for further processing. Particles were  
311 autopicked using 2D classes as references and extracted in RELION (35) and initial 2D  
312 classification was performed in cryoSPARC (36). High quality 2D classes were selected for  
313 further processing. The initial model was *de novo* generated and subsequent 3D refinement were  
314 performed using cryoSPARC. The UCSF PyEM package (<https://github.com/asarnow/pyem>)  
315 script was used to convert the cryoSPARC coordinates into Relion. Duplicate particles were  
316 removed and particles were analyzed by 3D refinement, Bayesian Particle Polishing and CTF  
317 Refinement in Relion. The data were binned to 1.5 Å/pixel, refined with D2 symmetry, and  
318 symmetry expanded. Symmetry expanded particles were used in 3D classification without  
319 alignment. All reconstructions were analyzed using USCF Chimera. The initial model was built  
320 rigidly docking individual protein structures into the EM map using Chimera. The model was  
321 then fit and adjusted manually in USCF Chimera and Coot (37). The figures were generated  
322 using UCSF Chimera, and local resolution and final Fourier shell correlation were calculated  
323 using ResMap (38) and cryoSPARC.

324

### 325 *Data deposition*

326 Density map of GFP:DARPin-aldolase complex has been deposited in the Electron Microscopy  
327 Data Bank (EMDB) with access code: EMD-9277 and PDB 6MWQ.

328

329

330

## Acknowledgement

331

332 We thank Dr. Mark Herzik Jr. and Mengyu Wu at The Scripps Research Institute for help with  
333 sample preparation. We also thank Dr. Songye Chen, Dr. Andrey Malyutin, Dr. Rebecca  
334 Voorhees, and Dr. Bil Clemons at Caltech for technical assistance. We are also grateful to all  
335 members of the Jensen laboratory for discussion and technical assistance. This work was  
336 supported by funds from NIH NIGMS P50 082545. CryoEM work was performed in the  
337 Beckman Institute Resource Center for Transmission Electron Microscopy at Caltech.

338

339

## Figure captions

340

341 **Fig 1. The Design of the platform.**

342 (A) The platform base was homotetrameric rabbit muscle aldolase (PDB ID code 5VY5). One  
343 subunit was depicted with rainbow coloring and N and C labels to indicate the orientation of the  
344 monomer chain. The other three identical subunits are shown in yellow. Aldolase has D2  
345 symmetry. (B) The selectable adapter was a Designed Ankyrin Repeat Protein (DARPin) (PDB  
346 ID Code 5MA6). A DARPin is made up of a series of ankyrin repeat motifs (a beta turn followed  
347 by two antiparallel alpha helices). Here a DARPin against GFP was used. The general structure  
348 of the library this DARPin came from is an N-terminal cap (red) followed by a series of internal  
349 binding modules (here module 1 (orange), module 2 (yellow) and module 3 (green)) that are  
350 stabilized by a C-terminal cap (blue) (12). Shown below is a close-up view of the repetitive motif  
351 of DARPin with its amino acid sequence (orange). Using a phage display library, DARPins can  
352 be generated against a protein target. The selectable residues are depicted in black as X (any  
353 amino acid except cysteine or proline) or Z (amino acids asparagine, histidine or tyrosine) (12).  
354 (C) The final helix of the C-terminal cap of the DARPin (orange) was directly fused to the first  
355 alpha helix of aldolase (yellow) to form the platform subunit. (D) The D2 symmetry of the  
356 DARPin-aldolase fusion demonstrates ample space for target binding. (E) Spheres (radius=60 Å)  
357 were drawn in the position where each DARPin binds its target. A globular protein of up to 740  
358 kDa could be accommodated on the DARPin-aldolase platform without steric clash. (F) The  
359 model of the DARPin-aldolase platform in complex with GFP (green) is shown.

360

361 **Fig 2. The cryoEM structure of the DARPin-aldolase platform in complex with the target**  
362 **GFP**

363 (A) Surface of the 3 Å C1 reconstruction of DARPin-aldolase platform in complex with GFP.  
364 The crystal structures of GFP (green), the DARPin (orange) and aldolase (yellow) were docked  
365 into the cryoEM density. Shown on the left is the overall structure and on the right is the  
366 expanded view of GFP and the DARPin fit into the density of the best resolved subunit. The  
367 expanded view in the dashed line box is shown from the top (left) and halfway down the  
368 DARPin with clipping (right) to indicate the quality of the fit. (B) Ribbon diagram (left) and  
369 cryoEM density (right, blue mesh, zoned 1.8 Å within atoms) of an internal aldolase helix  
370 (residues Arg369 to Asp387). (C) Ribbon diagram (left) and cryoEM density (right, blue mesh,  
371 zoned 1.8 Å within atoms) of the helical linker (residues Ala176 to Ile191) between the DARPin  
372 (orange, residues Ala176 to Lys181) and aldolase (yellow, residues Leu182 to Ile191). (D)  
373 ResMap local resolution estimate of the final DARPin-aldolase platform in complex with GFP  
374 (left) and of the best subunit (right). The expanded view in the dashed line box is shown from the  
375 side (left) and halfway into the GFP:DARPin density with clipping (right).

376

377 **Fig 3. Symmetry expanded 3D classification of the GFP:DARPin region of the density.**

378 (A) CryoEM density of the D2 reconstruction of the DARPin-aldolase platform in complex with  
379 GFP (grey) is shown with a mask (pink) around one GFP:DARPin region. Symmetry expansion  
380 was applied to this particle set so that each GFP:DARPin region in each tetramer could be  
381 considered independently in 3D classification. (B) 3D classification without alignment of the  
382 symmetry expanded particles yielded five reasonable classes. The number of particles per class is  
383 indicated above each class. Each density was viewed at the same threshold in Chimera to  
384 facilitate direct comparisons. (C) The classes in Fig 3B were each compared with Class 4 (grey)  
385 to show the displacement between classes. The XZ plane is shown and the Y axis is  
386 perpendicular to the page. Class 4 was clearly displaced relative to the other classes. (D) The  
387 comparison from Fig 3B is now viewed looking down the Z axis. (E) The view from Fig 3D was  
388 adjusted to look down the helical linker. Residue Arg190, the C-cap helix 1, and the binding  
389 module 3 are labeled with arrows to orient the reader relative to Fig 1.

390

391

392

## Supporting information

393

### 394 **S1 Fig. Attempted platform designs and outcomes**

395 (A) Models of the seven platform base proteins tested here. Different subunits of the platform  
396 were drawn by different colors. The fused DARPIn (in green) and target GFP (in cyan) were  
397 shown for only one subunit for clarity. (B) Table summarizing the progress and problems related  
398 to our designs

399

### 400 **S2 Fig. Sequence of DARPIn-aldolase fusion and the purification of GFP-DARPIn-aldolase** 401 **complex**

402 (A) The amino acid sequence of DARPIn-aldolase fusion is colored with the DARPIn sequence  
403 in brown and the aldolase sequence in green. The residues that were randomized in the phage  
404 display library are colored in red. The secondary structures are indicated on top of the sequence  
405 with  $\alpha$ -helix in magenta tubes and  $\beta$ -strand in green arrows. The rigid helical linker is  
406 represented by a blue tube. (B) Gel filtration chromatography of the purified DARPIn-aldolase  
407 platform in complex with GFP on Superdex 200 column. The black arrows mark the molecular  
408 weight calibration and void volume. Fractions 1 to 5 are labeled. (C) SDS-Page gel stained with  
409 Coomassie Blue of fractions 1 to 5 from the gel filtration chromatography. The bands  
410 representing the DARPIn aldolase platform subunit and the GFP are labeled.

411

### 412 **S3 Fig. Major steps of the last cycle of cryoEM data processing**

413

### 414 **S4 Fig. Raw micrographs with CTF correction at 0° and 26° tilt**

415 (A)-(C) Motion-corrected, dose weighted micrograph of DARPIn-aldolase platform in complex  
416 with GFP in vitreous ice is acquired at a nominal magnification of 165,000 $\times$  (left) with the  
417 Fourier transformation (inset) and the CTFFind4 plot result (right). Micrographs were collected  
418 at 0° tilt in the first session (A), at 0° tilt in the second session (B) and at 26° tilt in the third  
419 session (C). Each micrograph has been low-pass filtered to 10 Å to enhance the contrast. The  
420 power spectrum of this micrographs is shown as an inset. CTF estimation fit (orange line) to

421 experimental power spectrum (green line) and quality of fit (blue line) are plotted against spatial  
422 frequency ( $1/\text{\AA}$ ). Scale bar, 20 nm.

423

424 **S5 Fig. 2D classes and FSC from the DARPin-aldolase platform in complex with GFP**  
425 **refinement**

426 (A) Representative 2D classification results from Relion. (B) Relion Post Processing Fourier  
427 Shell Correlation (FSC) plot for the C1 refinement of the DARPin-aldolase platform in complex  
428 with GFP. A B factor of  $-75 \text{\AA}^2$  was used to sharpen the map. FSC for the phase randomized  
429 masked map (red), the unmasked map (green), the masked map (blue) and the corrected map  
430 (black) are plotted. The FSC=0.143 cutoff is annotated with a black horizontal line.

431

432 **S6 Fig. 3D classification without alignment of the symmetry expanded class 2.**

433 Class 2 (yellow, top row) from the 3D classification discussed in Fig 3 contained over 50% of  
434 the particles and appeared to lack a DARPin, so it was selected for an additional round of 3D  
435 classification without alignment. The resulting five classes (bottom row) show low resolution  
436 density in the GFP:DARPin region of the map.

437

438 **S1 Movie.**

439 Model of the DARPin-aldolase platform in complex with four spheres (radius=60  $\text{\AA}$ ) anchored at  
440 the DARPin binding sites.

441

442 **S2 Movie.**

443 ResMap local resolution estimation of the DARPin-aldolase platform in complex with GFP.

444

445 **Reference**

446

- 447 1. Henderson R. The potential and limitations of neutrons, electrons and X-rays for atomic  
448 resolution microscopy of unstained biological molecules. *Q Rev Biophys.* 1995;28(2):171-93.
- 449 2. Khoshouei M, Radjainia M, Baumeister W, Danev R. Cryo-EM structure of haemoglobin  
450 at 3.2  $\text{\AA}$  determined with the Volta phase plate. *Nat Commun.* 2017;8:16099.
- 451 3. Brocchieri L, Karlin S. Protein length in eukaryotic and prokaryotic proteomes. *Nucleic*  
452 *Acids Res.* 2005;33(10):3390-400.

- 453 4. Kratz PA, Bottcher B, Nassal M. Native display of complete foreign protein domains on  
454 the surface of hepatitis B virus capsids. *Proc Natl Acad Sci U S A*. 1999;96(5):1915-20.
- 455 5. Coscia F, Estrozi LF, Hans F, Malet H, Noirclerc-Savoie M, Schoehn G, et al. Fusion to a  
456 homo-oligomeric scaffold allows cryo-EM analysis of a small protein. *Sci Rep*. 2016;6:30909.
- 457 6. Jensen GJ, Kornberg RD. Single-particle selection and alignment with heavy atom  
458 cluster-antibody conjugates. *Proc Natl Acad Sci U S A*. 1998;95(16):9262-7.
- 459 7. Wu S, Avila-Sakar A, Kim J, Booth DS, Greenberg CH, Rossi A, et al. Fabs enable single  
460 particle cryoEM studies of small proteins. *Structure*. 2012;20(4):582-92.
- 461 8. Liu Y, Gonen S, Gonen T, Yeates TO. Near-atomic cryo-EM imaging of a small protein  
462 displayed on a designed scaffolding system. *Proc Natl Acad Sci U S A*. 2018;115(13):3362-7.
- 463 9. Padilla JE, Colovos C, Yeates TO. Nanohedra: using symmetry to design self assembling  
464 protein cages, layers, crystals, and filaments. *Proc Natl Acad Sci U S A*. 2001;98(5):2217-21.
- 465 10. Jeong WH, Lee H, Song DH, Eom JH, Kim SC, Lee HS, et al. Connecting two proteins using  
466 a fusion alpha helix stabilized by a chemical cross linker. *Nat Commun*. 2016;7:11031.
- 467 11. Graille M, Stura EA, Corper AL, Sutton BJ, Taussig MJ, Charbonnier JB, et al. Crystal  
468 structure of a *Staphylococcus aureus* protein A domain complexed with the Fab fragment of a  
469 human IgM antibody: structural basis for recognition of B-cell receptors and superantigen  
470 activity. *Proc Natl Acad Sci U S A*. 2000;97(10):5399-404.
- 471 12. Brauchle M, Hansen S, Caussin E, Lenard A, Ochoa-Espinosa A, Scholz O, et al. Protein  
472 interference applications in cellular and developmental biology using DARPins that recognize  
473 GFP and mCherry. *Biol Open*. 2014;3(12):1252-61.
- 474 13. Bartesaghi A, Merk A, Banerjee S, Matthies D, Wu X, Milne JL, et al. 2.2 Å resolution  
475 cryo-EM structure of beta-galactosidase in complex with a cell-permeant inhibitor. *Science*.  
476 2015;348(6239):1147-51.
- 477 14. Kudryashev M, Wang RY, Brackmann M, Scherer S, Maier T, Baker D, et al. Structure of  
478 the type VI secretion system contractile sheath. *Cell*. 2015;160(5):952-62.
- 479 15. Shoji S, Dambacher CM, Shajani Z, Williamson JR, Schultz PG. Systematic chromosomal  
480 deletion of bacterial ribosomal protein genes. *J Mol Biol*. 2011;413(4):751-61.
- 481 16. Yao Q, Lu Q, Wan X, Song F, Xu Y, Hu M, et al. A structural mechanism for bacterial  
482 autotransporter glycosylation by a dodecameric heptosyltransferase family. *Elife*. 2014;3.
- 483 17. Herzik MA, Jr., Wu M, Lander GC. Achieving better-than-3-Å resolution by single-particle  
484 cryo-EM at 200 keV. *Nat Methods*. 2017;14(11):1075-8.
- 485 18. Ullmann A, Jacob F, Monod J. Characterization by in vitro complementation of a peptide  
486 corresponding to an operator-proximal segment of the beta-galactosidase structural gene of  
487 *Escherichia coli*. *J Mol Biol*. 1967;24(2):339-43.
- 488 19. Naydenova K, Russo CJ. Measuring the effects of particle orientation to improve the  
489 efficiency of electron cryomicroscopy. *Nat Commun*. 2017;8(1):629.
- 490 20. Hansen S, Stuber JC, Ernst P, Koch A, Bojar D, Batyuk A, et al. Design and applications of  
491 a clamp for Green Fluorescent Protein with picomolar affinity. *Sci Rep*. 2017;7(1):16292.
- 492 21. Zhou M, Li Y, Hu Q, Bai XC, Huang W, Yan C, et al. Atomic structure of the apoptosome:  
493 mechanism of cytochrome c- and dATP-mediated activation of Apaf-1. *Genes Dev*.  
494 2015;29(22):2349-61.



- 495 22. Zhang Z, Liang WG, Bailey LJ, Tan YZ, Wei H, Wang A, et al. Ensemble cryoEM elucidates  
496 the mechanism of insulin capture and degradation by human insulin degrading enzyme. *Elife*.  
497 2018;7.
- 498 23. Seeger MA, Zbinden R, Flutsch A, Gutte PG, Engeler S, Roschitzki-Voser H, et al. Design,  
499 construction, and characterization of a second-generation DARP in library with reduced  
500 hydrophobicity. *Protein Sci*. 2013;22(9):1239-57.
- 501 24. Yu H, Kohl A, Binz HK, Pluckthun A, Grutter MG, van Gunsteren WF. Molecular dynamics  
502 study of the stabilities of consensus designed ankyrin repeat proteins. *Proteins*. 2006;65(2):285-  
503 95.
- 504 25. Kohl A, Binz HK, Forrer P, Stumpp MT, Pluckthun A, Grutter MG. Designed to be stable:  
505 crystal structure of a consensus ankyrin repeat protein. *Proc Natl Acad Sci U S A*.  
506 2003;100(4):1700-5.
- 507 26. Amstutz P, Binz HK, Parizek P, Stumpp MT, Kohl A, Grutter MG, et al. Intracellular kinase  
508 inhibitors selected from combinatorial libraries of designed ankyrin repeat proteins. *J Biol*  
509 *Chem*. 2005;280(26):24715-22.
- 510 27. Kohl A, Amstutz P, Parizek P, Binz HK, Briand C, Capitani G, et al. Allosteric inhibition of  
511 aminoglycoside phosphotransferase by a designed ankyrin repeat protein. *Structure*.  
512 2005;13(8):1131-41.
- 513 28. Kramer MA, Wetzel SK, Pluckthun A, Mittl PR, Grutter MG. Structural determinants for  
514 improved stability of designed ankyrin repeat proteins with a redesigned C-capping module. *J*  
515 *Mol Biol*. 2010;404(3):381-91.
- 516 29. Interlandi G, Wetzel SK, Settanni G, Pluckthun A, Caflisch A. Characterization and further  
517 stabilization of designed ankyrin repeat proteins by combining molecular dynamics simulations  
518 and experiments. *J Mol Biol*. 2008;375(3):837-54.
- 519 30. Pettersen EF, Goddard TD, Huang CC, Couch GS, Greenblatt DM, Meng EC, et al. UCSF  
520 Chimera--a visualization system for exploratory research and analysis. *J Comput Chem*.  
521 2004;25(13):1605-12.
- 522 31. Mastrorade DN. Automated electron microscope tomography using robust prediction  
523 of specimen movements. *J Struct Biol*. 2005;152(1):36-51.
- 524 32. Kremer JR, Mastrorade DN, McIntosh JR. Computer visualization of three-dimensional  
525 image data using IMOD. *J Struct Biol*. 1996;116(1):71-6.
- 526 33. Zheng SQ, Palovcak E, Armache JP, Verba KA, Cheng Y, Agard DA. MotionCor2:  
527 anisotropic correction of beam-induced motion for improved cryo-electron microscopy. *Nat*  
528 *Methods*. 2017;14(4):331-2.
- 529 34. Grant T, Grigorieff N. Measuring the optimal exposure for single particle cryo-EM using a  
530 2.6 Å reconstruction of rotavirus VP6. *Elife*. 2015;4:e06980.
- 531 35. Kimanius D, Forsberg BO, Scheres SH, Lindahl E. Accelerated cryo-EM structure  
532 determination with parallelisation using GPUs in RELION-2. *Elife*. 2016;5.
- 533 36. Punjani A, Rubinstein JL, Fleet DJ, Brubaker MA. cryoSPARC: algorithms for rapid  
534 unsupervised cryo-EM structure determination. *Nat Methods*. 2017;14(3):290-6.
- 535 37. Emsley P, Cowtan K. Coot: model-building tools for molecular graphics. *Acta Crystallogr*  
536 *D Biol Crystallogr*. 2004;60(Pt 12 Pt 1):2126-32.
- 537 38. Kucukelbir A, Sigworth FJ, Tagare HD. Quantifying the local resolution of cryo-EM  
538 density maps. *Nat Methods*. 2014;11(1):63-5.



Figure 1

**A**

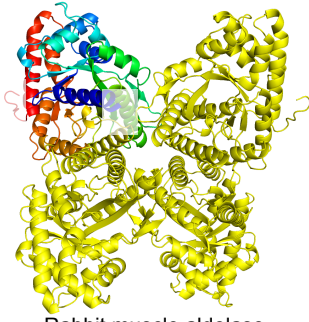

Rabbit muscle aldolase

**Platform base**

**B**

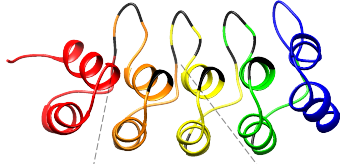

**XDXXGXTPHLAAXXG**  
**HLEIVEVLLKZGADVNA**

Designed ankyrin repeat protein  
(DARPin)

**Selectable adaptor**

**C**

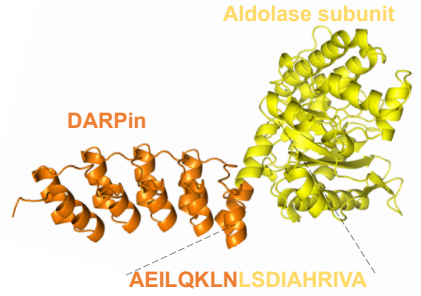

Aldolase subunit

DARPin

**AEILQKLNLSDIAHRIVA**

**Rigid helical linker**

**D**

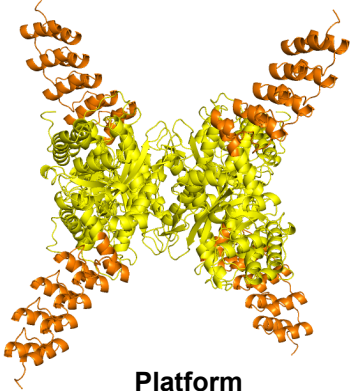

**Platform**

**E**

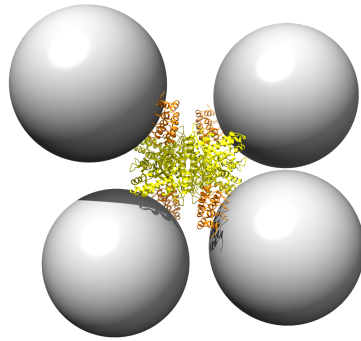

Sphere radius=60 Å

**F**

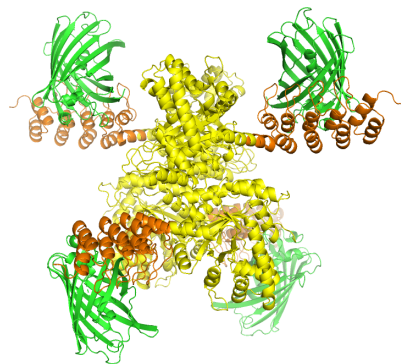

**Platform with target**

Figure 2

A

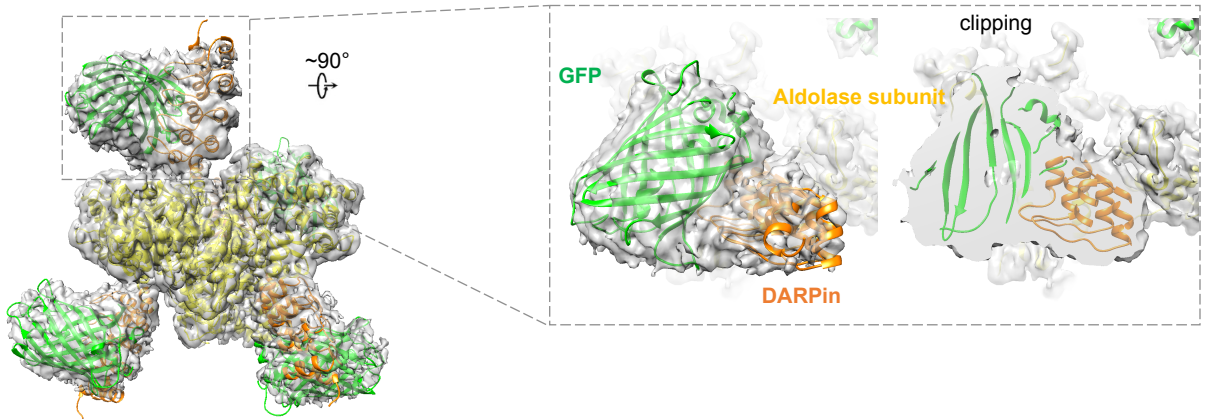

B

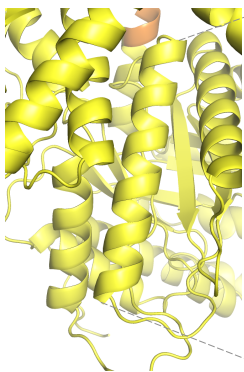

Aldolase inner helix

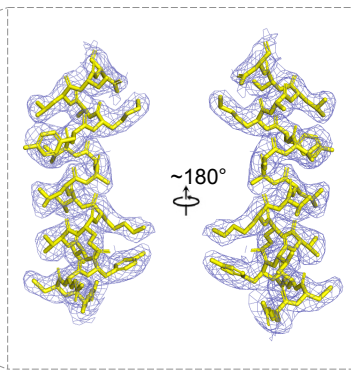

C

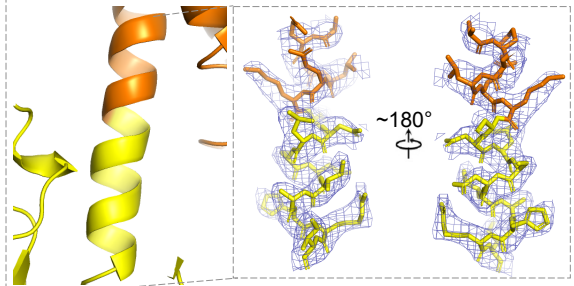

Rigid  $\alpha$ -helical linker

D

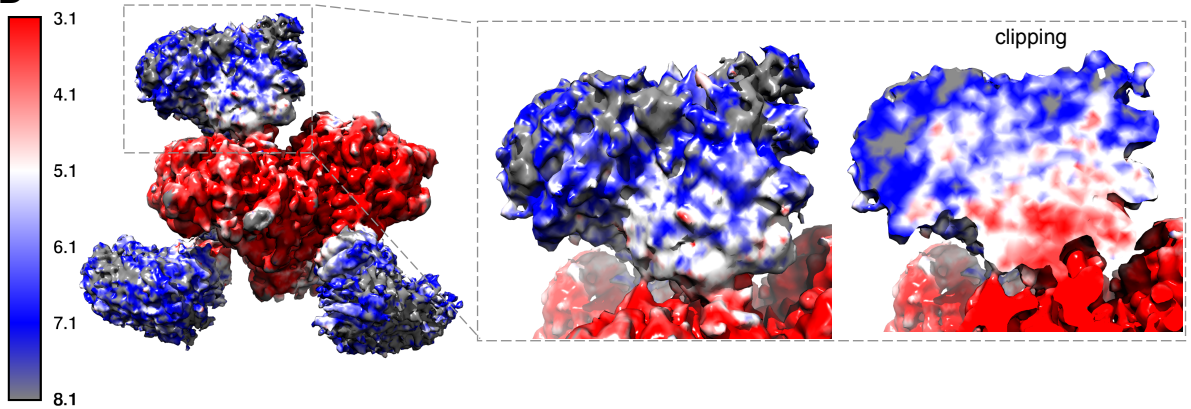

Figure 3

**A**

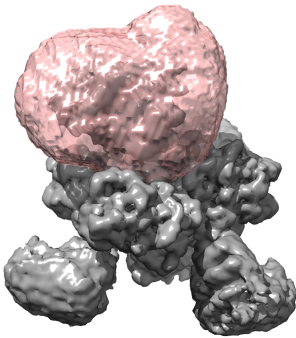

**B**

Class 1  
58,625 particles

Class 2  
507,265 particles

Class 3  
39,780 particles

Class 4  
26,963 particles

Class 5  
312,692 particles

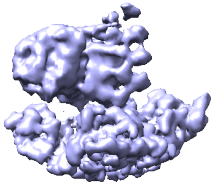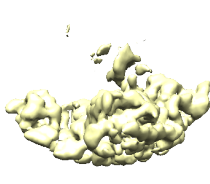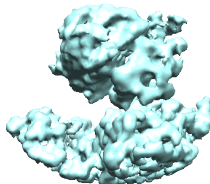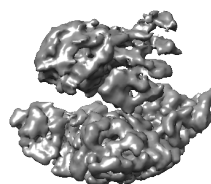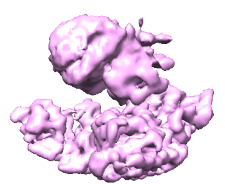

**C**

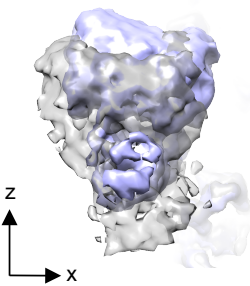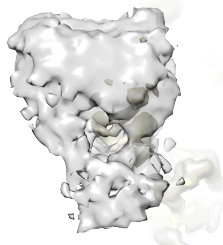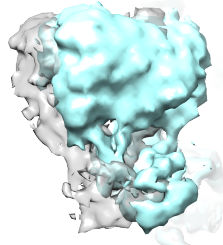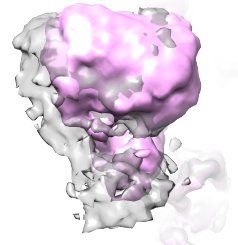

**D**

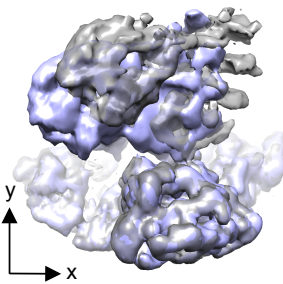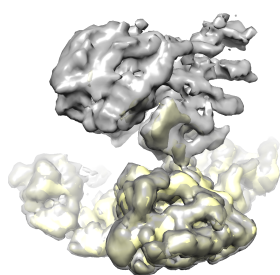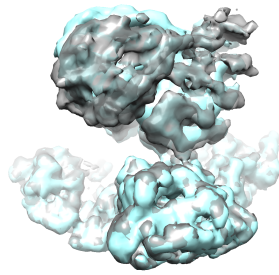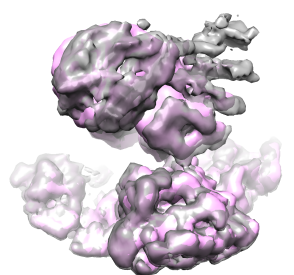

Source: http://biorxiv.org/content/10.1101/455063v1.full.pdf
